# Supplementary material for: SOX2 and PI3K Cooperate to Induce and Stabilize a Squamous-Committed Stem Cell Injury State during Lung Squamous Cell Carcinoma Pathogenesis
Source: PLoS Biol. 2016 Nov 23;14(11):e1002581. doi: 10.1371/journal.pbio.1002581 (PMC5120804; doi:10.1371/journal.pbio.1002581)
Supplement: S1 Data — (XLSX) [file pbio.1002581.s001.xlsx]

## Sheet: Fig 1B
Sample	SOX2 expression normalized	SOX2 expression normalized	LRR score
	to TBP and relative to Basal	to TBP and relative to CD44+
	cells/Vector/replicate #1	tracheal basal cells
Cell suspension trachea #1	62.6	97.6599	NA
Cell suspension trachea #2	62.8	97.9719	NA
Cell suspension trachea #3	70.2	109.516	NA
Cell suspension trachea #4	164.7	256.942	NA
CD44+ FACS purified basal cells from trachea	64.1	100	NA
CD44+ FACS purified basal cells from ALI cultures	90.5	141.186	NA
SQCC PDX #140	67.5	105.304	0.34
SQCC PDX#57	69.6	108.58	0.3
SQCC PDX#55	72.4	112.949	1.01
SQCC PDX#77	104.5	163.027	0.46
SQCC PDX#142	108.5	169.267	0.38
SQCC PDX#50	141.6	220.905	0.45
SQCC PDX#188	159.7	249.142	0.5
SQCC PDX#106	0.2	0.312012	-0.14
SQCC PDX#62	2.6	4.05616	0.13
SQCC PDX#86	3.9	6.08424	0.09
SQCC PDX#123	7	10.9204	0.2
ADC PDX#116	1.4	2.18409	NA
ADC PDX#191	3	4.68019	NA
Basal cells/Vector/replicate #1	1		NA
Basal cells/Vector/replicate #2	0.884219		NA
Basal cells/Vector/replicate #3	0.996587		NA
Basal cells/Lenti-SOX2/replicate #1	184.629		NA
Basal cells/Lenti-SOX2/replicate #2	150.878		NA
Basal cells/Lenti-SOX2/replicate #3	151.964		NA
Basal cells/Vector/mean of 3 replicates	0.96	1	NA
Basal cells/Lenti-SOX2/mean of 3 replicates	163	254	NA
Basal cells/Vector/replicate #1	1
Basal cells/Vector/replicate #2	0.884219
Basal cells/Vector/replicate #3	0.996587
Mean	0.960269
SEM	0.04
Basal cells/Lenti-SOX2/replicate #1	184.629
Basal cells/Lenti-SOX2/replicate #2	150.878
Basal cells/Lenti-SOX2/replicate #3	151.964
Mean	162.49
SEM	11.1
NA = not applicable

## Sheet: Fig 1D
		Gene expression normalized to TBP
		and relative to ALI-subconfluent
Sample	Gene	Replicate 1	Replicate 2	Replicate 3	Mean	SEM	Mean normalized	Normalized
							to highest expression	SEM
Plastic-subconfluent	SOX2	0.471714	0.470597	0.206706	0.383006	0.087	1.32613	0.301232
ALI-subconfluent	SOX2	1	1.36234	1.29072	1.21769	0.11	4.21616	0.380868
ALI-initial confluence	SOX2	3.03164	2.46412	2.13595	2.5439	0.26	8.8081	0.900233
ALI-1 wk post-confluence	SOX2	21.3688	19.3857	18.6892	19.8145	0.8	68.6065	2.76995
ALI-5 wks post-confluence	SOX2	32.9674	29.639	24.0378	28.8814	2.61	100	9.03695
Plastic-subconfluent	MUC16	0.0867714	0.146678	0.0330527	0.0888339	0.035	0.570713	0.224857
ALI-subconfluent	MUC16	1	0.735695	0.810155	0.848617	0.078	5.45193	0.50111
ALI-initial confluence	MUC16	2.91434	1.25612	1.16605	1.77883	0.57	11.4281	3.66196
ALI-1 wk post-confluence	MUC16	16.8431	14.0494	15.8038	15.5654	0.81	100	5.20384
ALI-5 wks post-confluence	MUC16	9.94887	13.1174	9.65012	10.9055	1.11	70.0621	7.13118
Plastic-subconfluent	FOXJ1	2.37411	0.203041	2.82764	1.80159	0.81	0.0269209	0.0121037
ALI-subconfluent	FOXJ1	1	1.83858	0.491858	1.11015	0.39	0.0165887	0.0058277
ALI-initial confluence	FOXJ1	3.32512	10.8454	11.9335	8.70135	2.7	0.130023	0.0403456
ALI-1 wk post-confluence	FOXJ1	4679.86	1591.5	1901.61	2724.33	982	40.7091	14.6739
ALI-5 wks post-confluence	FOXJ1	10183	5319.81	4573.72	6692.18	1759	100	26.2844

## Sheet: Fig 2C, 3A
	Glands/mm	% coverage with
		squamous lesions
Basal cells/Vector replicate #1	0	0
Basal cells/Vector replicate #2	0	0
Basal cells/Vector replicate #3	0	0
Mean	0	0
SEM	0	0
Basal cells/Lenti-SOX2 replicate #1	5.98	16.63
Basal cells/Lenti-SOX2 replicate #2	5.82	5.16
Basal cells/Lenti-SOX2 replicate #3	3.06	16.25
Mean	4.95333	12.68
SEM	0.95	3.76
2 tailed t test	0.00640038	0.0280202

## Sheet: Fig 3D (Ki67)
	Replicate #1				Replicate #2				Replicate #3
	Vector		Lenti-SOX2		Vector		Lenti-SOX2		Vector		Lenti-SOX2
	Ki67+ cells	length (um)	Ki67+ cells	length (um)	Ki67+ cells	length (um)	Ki67+ cells	length (um)	Ki67+ cells	length (um)	Ki67+ cells	length (um)
Section 1	11	1388.4	51	1386.3	14	1389.82	82	1342.95	35	1426.09	29	1315.03
Section 2	1	1400.15	50	1473.74	5	1530.92	15	1506.69	22	1390.81	20	1410.96
Section 3	2	1437.18	37	1381.89	9	1492.71	25	1401.85	32	1540.34	32	1449.52
Section 4	4	1435.49	33	1426.67	5	1602.63	24	1397.09	9	1436.44	19	1641.42
Section 5	7	1491.78	10	1334.17	11	1431.06	7	1636.72	11	1402.6	8	1438.25
Section 6	7	1451.46	30	1400.45	8	1626.16	22	1395.55	22	1405.41	28	1404.15
Section 7	7	1396.01	34	1428.43	8	1437.73	26	1412.01	13	1443.43	35	1384.27
Section 8	3	1378.2	29	1380.96	10	1397.93	20	1386.64	16	1421.57	19	1415.06
Section 9	3	1405.1	38	1389.55			15	1380.52	39	1371.87	30	1384.78
Section 10	17	1354.86	31	1139.69			4	1589.14	6	1380.78	14	1411.12
Section 11			27	1391.39			27	1429.48	11	1310.85	30	1392.75
Section 12			32	1415.38			43	1464.81	8	1372.38	17	1485.17
Section 13			64	1426.59			95	1393.96	12	1407.81	23	1526.46
Section 14			23	1216.9			1	1616.97	10	970.12	31	1405.01
Section 15			30	1471.67			44	1384.15			37	1385.6
Section 16											31	972
Sum	62	14138.6	519	20663.8	70	11909	450	21738.5	246	19280.5	403	22421.5
Ki67+ cells/mm	4.38515		25.1164		5.87793		20.7006		12.759		17.9738
	Ki67+ cells/mm
Vector replicate #1	4.4
Vector replicate #2	5.9
Vector replicate #3	12.8
Mean	7.7
SEM	2.59
Lenti-SOX2 replicate #1	25.1
Lenti-SOX2 replicate #2	20.7
Lenti-SOX2 replicate #3	18
Mean	21.2667
SEM	2.07
2 tailed t test	0.0149031

## Sheet: Fig 3D (TP63)
	Replicate #1				Replicate #2				Replicate #3
	Vector		Lenti-SOX2		Vector		Lenti-SOX2		Vector		Lenti-SOX2
	TP63+ cells	length (um)	TP63+ cells	length (um)	TP63+ cells	length (um)	TP63+ cells	length (um)	TP63+ cells	length (um)	TP63+ cells	length (um)
Section 1	25	446.45	40	444.08	11	221.56	18	222.05	30	446.78	75	452.93
Section 2	24	444.7	48	448.69	16	226.85	15	221.88	27	496.93	70	446.23
Section 3	35	445.02	36	459.7	10	222.71	16	221.58	32	446.43	42	448.58
Section 4	24	448.4	62	446.3	10	221.89	9	221.58	35	446.73	34	447.47
Section 5	27	456.6	36	450.13	7	221.56	10	221.58	21	454.9	19	452.02
Section 6	30	454.48	36	445.06	10	221.56	20	221.58	20	450.36	35	459.38
Section 7	22	445.49	20	445.98	8	221.56	17	221.58	22	447.15	33	451.09
Section 8	23	457.03	39	445.98	10	221.56	7	226.98	23	461.83	59	464.5
Section 9	14	445.23	19	446.33	18	221.56	13	221.58	22	446.04	0	155.1
Section 10	19	445.92	26	454.5	20	221.56	9	221.58	21	446.05	58	688.3
Section 11	21	459.11	46	446.15	12	221.56	9	221.58	20	445.26	15	450.56
Section 12	19	446.17	50	445.64	10	221.56	11	221.58	25	445.58	27	457.69
Section 13			15	445.66	12	221.56	18	221.58	32	500.02	25	486.37
Section 14			36	440.81	6	221.56	24	221.58	24	445.02	58	463.06
Section 15			48	445.17	11	221.56	17	224.92	24	443.5	32	446.76
Section 16			52	445.14	10	221.56	9	227.71	29	446.37	18	469.87
Section 17			33	404.24	14	231.07	14	221.58	37	446.14	45	484.47
Section 18			36	448.48	6	221.56	13	221.58	30	446.79	54	449.59
Section 19			29	450.22	13	221.56	44	221.58	25	469.84	31	456.61
Section 20			30	452.67	9	221.56	39	224	22	445.35	9	445.99
Section 21			17	445.01	10	221.56	30	224.37	16	449.23	25	445.29
Section 22			25	447.33			7	221.58	20	444.73
Section 23			39	446.2			14	234.37	20	444.49
Section 24			43	445.37			16	221.58
Section 25			44	447.4			17	221.58
Section 26			43	452.06			15	221.58
Section 27			36	444.75
Section 28			30	446.65
Section 29			53	445.69
Sum	283	5394.6	1067	12931.4	233	4669.04	431	5794.72	577	10415.5	764	9521.86
TP63+ cells/mm	52.4599		82.5124		49.9032		74.3781		55.3981		80.2364
	TP63+ cells/mm
Vector replicate #1	52.5
Vector replicate #2	49.9
Vector replicate #3	55.4
Mean	52.6
SEM	1.59
Lenti-SOX2 replicate #1	82.5
Lenti-SOX2 replicate #2	74.4
Lenti-SOX2 replicate #3	80.2
Mean	79.0333
SEM	2.41
2 tailed t test	0.00078921

## Sheet: Fig 3F
	CDKN1A expression	CDKN1C expression			CDKN1A		CDKN1A
Sample	relative to vector	relative to vector			Vector	Lenti-SOX2	Vector	Lenti-SOX2
Vector replicate #1	1	1		Replicate pair #1	1	0.34	1	0.39
Lenti-Sox2 replicate #1	0.34	0.39		Replicate pair #2	1	0.66	1	0.58
				Replicate pair #3	1	0.16	1	0.37
Vector replicate #2	1	1		Replicate pair #4	1	0.51	1	0.87
Lenti-Sox2 replicate #2	0.66	0.58		Mean	1	0.4175	1	0.5525
				SEM	0	0.11	0	0.12
Vector replicate #3	1	1		paired 2 tailed t test		0.0124537		0.0307305
Lenti-Sox2 replicate #3	0.16	0.37
Vector replicate #4	1	1
Lenti-Sox2 replicate #4	0.51	0.87
Gene expression was normalized
to TBP

## Sheet: Fig 3G
	MUC16 expression	TMPRSS11B expression	SPRR3 expression	IVL expression	SPRR1A expression	SPRR2A expression
	relative to vector	relative to vector	relative to vector	relative to vector	relative to vector	relative to vector
Vector replicate #1	1	1	1	1	1	1
Lenti-Sox2 replicate #1	37.87	90.1343	832.49	7.72589	39.0583	11.7689
Vector replicate #2	1	1	1	1	1	1
Lenti-Sox2 replicate #2	52.52	174.906	2171.66	7.65595	72.6597	19.8305
Vector replicate #3	1	1	1	1	1	1
Lenti-Sox2 replicate #3	113.15	72.797	1478.38	6.3503	56.8448	14.4081
Vector replicate #4	1	1	1	1	1	1
Lenti-Sox2 replicate #4	87.75	75.6485	400.54	16.1973	13.3039	42.0186
Vector replicate #5	Nd	1	Nd	1	Nd	1
Lenti-Sox2 replicate #5	Nd	236.392	Nd	4.80685	Nd	36.8479
		MUC16	TMPRSS11B	SPRR3	IVL	SPRR1A	SPRR2A
	Vector	Lenti-SOX2	Lenti-SOX2	Lenti-SOX2	Lenti-SOX2	Lenti-SOX2	Lenti-SOX2
Replicate pair #1	1	37.87	90.1343	832.49	7.72589	39.0583	11.7689
Replicate pair #2	1	52.52	174.906	2171.66	7.65595	72.6597	19.8305
Replicate pair #3	1	113.15	72.797	1478.38	6.3503	56.8448	14.4081
Replicate pair #4	1	87.75	75.6485	400.54	16.1973	13.3039	42.0186
Replicate pair #5	1	Nd	236.392	Nd	4.80685	Nd	36.8479
Mean	1	72.8225	129.976	1220.77	8.54725	45.4667	24.9748
SEM	0	17.04	32.5203	386.662	1.98505	12.7293	6.09909
paired 2 tailed t test	NA	0.0243892	0.016594	0.0510832	0.0190702	0.0396738	0.0170903
Nd = not determined
NA = not applicable
Gene expression was
normalized to TBP

## Sheet: Fig 3H
	ADH7 expression	CHST7 expression	FGFR2 expression	FOXE1 expression
	relative to vector	relative to vector	relative to vector	relative to vector
Vector replicate #1	1	1	1	1
Lenti-Sox2 replicate #1	37.87	90.1343	832.49	7.72589
Vector replicate #2	1	1	1	1
Lenti-Sox2 replicate #2	52.52	174.906	2171.66	7.65595
Vector replicate #3	1	1	1	1
Lenti-Sox2 replicate #3	113.15	72.797	1478.38	6.3503
Vector replicate #4	1	1	1	1
Lenti-Sox2 replicate #4	87.75	75.6485	400.54	16.1973
Vector replicate #5	Nd	1	Nd	1
Lenti-Sox2 replicate #5	Nd	236.392	Nd	4.80685
		ADH7	CHST7	FGFR2	FOXE1
	Vector	Lenti-SOX2	Lenti-SOX2	Lenti-SOX2	Lenti-SOX2
Replicate pair #1	1	81	8.6	11.0301	13.5
Replicate pair #2	1	265.764	12.1709	9.88957	10.6704
Replicate pair #3	1	289.784	8.46838	4.94992	12.9273
Replicate pair #4	1	86.318	8.23575	7.4756	13.2028
Replicate pair #5	1	Nd	Nd	Nd	13.7947
Mean	1	182.666	9.36877	8.33629	12.819
SEM	0	43.623	0.937087	1.35023	0.556395
paired 2 tailed t test	NA	0.00704717	0.00296184	0.0122372	2.9038e-05
Nd = not determined
NA = not applicable
Gene expression was
normalized to TBP

## Sheet: Fig 3I
	% BTUB+ coverage				FOXJ1 expression				FOXJ1
	Vector	Lenti-SOX2			relative to vector			Vector	Lenti-SOX2
Field #1	1.2	7.02		Vector replicate #1	1		Replicate pair #1	1	0.28
Field #2	1.28	4.18		Lenti-Sox2 replicate #1	0.28		Replicate pair #2	1	0.18
Field #3	0.37	10.4					Replicate pair #3	1	0.25
Field #4	0.76	7.51		Vector replicate #2	1		Replicate pair #4	1	0.28
Field #5	2.15	5.31		Lenti-Sox2 replicate #2	0.18		Mean	1	0.2475
Field #6	2.33	9.9					SEM	0	0.0471699
Field #7	0.231	NA		Vector replicate #3	1		paired 2 tailed t test	NA	3.38293e-05
Field #8	0.35	NA		Lenti-Sox2 replicate #3	0.25
Field #9	0.46	NA
Field #10	3.55	NA		Vector replicate #4	1
Mean	1.2681	7.38667		Lenti-Sox2 replicate #4	0.28
SEM	0.345663	1.00236
2 tailed t test		6.95406e-06		Gene expression was
				normalized to TBP
NA = not applicable

## Sheet: Fig 4A
	Copy number status
Lung SQCC Case ID	SOX2	PIK3CA
TCGA-18-5592-01	GAIN;	GAIN;
TCGA-21-5784-01	GAIN;	GAIN;
TCGA-21-5786-01	GAIN;	GAIN;
TCGA-21-5787-01	GAIN;	GAIN;
TCGA-22-5472-01	GAIN;	GAIN;
TCGA-22-5480-01	GAIN;	GAIN;
TCGA-22-5485-01	GAIN;	GAIN;
TCGA-22-5489-01	GAIN;	GAIN;
TCGA-22-5492-01	GAIN;	GAIN;
TCGA-56-5897-01	GAIN;	GAIN;
TCGA-56-5898-01	GAIN;	GAIN;
TCGA-22-4593-01	GAIN;	GAIN;
TCGA-34-5927-01	GAIN;	GAIN;
TCGA-34-5928-01	GAIN;	GAIN;
TCGA-39-5024-01	GAIN;	GAIN;
TCGA-43-6647-01	GAIN;	GAIN;
TCGA-43-6771-01	GAIN;	GAIN;
TCGA-46-6026-01	GAIN;	GAIN;
TCGA-56-6545-01	GAIN;	GAIN;
TCGA-70-6722-01	GAIN;	GAIN;
TCGA-85-6175-01	GAIN;	Diploid
TCGA-85-6560-01	GAIN;	GAIN;
TCGA-85-6561-01	GAIN;	GAIN;
TCGA-22-1002-01	GAIN;	GAIN;
TCGA-22-1012-01	GAIN;	GAIN;
TCGA-22-1016-01	GAIN;	GAIN;
TCGA-34-2608-01	GAIN;	GAIN;
TCGA-43-2578-01	GAIN;	GAIN;
TCGA-60-2708-01	GAIN;	GAIN;
TCGA-60-2724-01	GAIN;	GAIN;
TCGA-66-2756-01	GAIN;	GAIN;
TCGA-66-2757-01	GAIN;	GAIN;
TCGA-66-2763-01	GAIN;	GAIN;
TCGA-66-2765-01	GAIN;	GAIN;
TCGA-66-2767-01	GAIN;	GAIN;
TCGA-66-2768-01	GAIN;	GAIN;
TCGA-66-2778-01	GAIN;	GAIN;
TCGA-66-2785-01	GAIN;	GAIN;
TCGA-66-2786-01	GAIN;	GAIN;
TCGA-18-3406-01	GAIN;	GAIN;
TCGA-18-3409-01	GAIN;	GAIN;
TCGA-18-3410-01	GAIN;	GAIN;
TCGA-18-3412-01	GAIN;	GAIN;
TCGA-18-3414-01	GAIN;	GAIN;
TCGA-18-3419-01	GAIN;	GAIN;
TCGA-18-3421-01	GAIN;	GAIN;
TCGA-43-3920-01	GAIN;	GAIN;
TCGA-46-3767-01	GAIN;	GAIN;
TCGA-46-3769-01	GAIN;	GAIN;
TCGA-66-2734-01	GAIN;	GAIN;
TCGA-66-2744-01	GAIN;	GAIN;
TCGA-66-2754-01	GAIN;	GAIN;
TCGA-66-2771-01	GAIN;	GAIN;
TCGA-66-2788-01	GAIN;	GAIN;
TCGA-37-4135-01	GAIN;	GAIN;
TCGA-37-4141-01	GAIN;	GAIN;
TCGA-22-4591-01	GAIN;	GAIN;
TCGA-22-4607-01	GAIN;	GAIN;
TCGA-37-3783-01	GAIN;	GAIN;
TCGA-60-2725-01	GAIN;	GAIN;
TCGA-66-2793-01	GAIN;	GAIN;
TCGA-22-4599-01	GAIN;	GAIN;
TCGA-33-4566-01	GAIN;	GAIN;
TCGA-33-4583-01	GAIN;	GAIN;
TCGA-33-4586-01	GAIN;	GAIN;
TCGA-39-5028-01	GAIN;	GAIN;
TCGA-39-5029-01	GAIN;	GAIN;
TCGA-39-5030-01	GAIN;	GAIN;
TCGA-39-5035-01	GAIN;	GAIN;
TCGA-63-5128-01	GAIN;	GAIN;
TCGA-18-5595-01	AMP;	AMP;
TCGA-21-5782-01	AMP;	AMP;
TCGA-22-5471-01	AMP;	AMP;
TCGA-22-5473-01	AMP;	AMP;
TCGA-22-5474-01	AMP;	AMP;
TCGA-22-5477-01	AMP;	AMP;
TCGA-22-5482-01	AMP;	AMP;
TCGA-22-5491-01	AMP;	AMP;
TCGA-37-5819-01	AMP;	AMP;
TCGA-34-5231-01	AMP;	AMP;
TCGA-34-5232-01	AMP;	AMP;
TCGA-34-5236-01	AMP;	AMP;
TCGA-34-5929-01	AMP;	AMP;
TCGA-39-5019-01	AMP;	AMP;
TCGA-39-5022-01	AMP;	AMP;
TCGA-39-5027-01	AMP;	AMP;
TCGA-43-6143-01	AMP;	AMP;
TCGA-43-6770-01	AMP;	AMP;
TCGA-46-6025-01	AMP;	AMP;
TCGA-60-2709-01	AMP;	AMP;
TCGA-70-6723-01	AMP;	AMP;
TCGA-21-1070-01	AMP;	AMP;
TCGA-21-1071-01	AMP;	AMP;
TCGA-21-1076-01	AMP;	AMP;
TCGA-21-1077-01	AMP;	AMP;
TCGA-21-1081-01	AMP;	AMP;
TCGA-22-0944-01	AMP;	AMP;
TCGA-56-1622-01	AMP;	AMP;
TCGA-34-2596-01	AMP;	AMP;
TCGA-34-2600-01	AMP;	AMP;
TCGA-60-2698-01	AMP;	AMP;
TCGA-60-2707-01	AMP;	AMP;
TCGA-60-2710-01	AMP;	AMP;
TCGA-60-2711-01	AMP;	AMP;
TCGA-60-2712-01	AMP;	AMP;
TCGA-60-2713-01	AMP;	GAIN;
TCGA-60-2715-01	AMP;	GAIN;
TCGA-60-2719-01	AMP;	AMP;
TCGA-60-2721-01	AMP;	AMP;
TCGA-60-2722-01	AMP;	AMP;
TCGA-60-2723-01	AMP;	AMP;
TCGA-60-2726-01	AMP;	AMP;
TCGA-66-2755-01	AMP;	AMP;
TCGA-66-2758-01	AMP;	AMP;
TCGA-66-2759-01	AMP;	AMP;
TCGA-66-2766-01	AMP;	AMP;
TCGA-66-2770-01	AMP;	AMP;
TCGA-66-2780-01	AMP;	AMP;
TCGA-66-2781-01	AMP;	AMP;
TCGA-66-2782-01	AMP;	AMP;
TCGA-18-3407-01	AMP;	AMP;
TCGA-18-3408-01	AMP;	AMP;
TCGA-18-3411-01	AMP;	AMP;
TCGA-18-3415-01	AMP;	AMP;
TCGA-18-3416-01	AMP;	AMP;
TCGA-37-3789-01	AMP;	AMP;
TCGA-43-3394-01	AMP;	AMP;
TCGA-46-3765-01	AMP;	AMP;
TCGA-46-3768-01	AMP;	AMP;
TCGA-66-2727-01	AMP;	AMP;
TCGA-66-2742-01	AMP;	AMP;
TCGA-66-2787-01	AMP;	AMP;
TCGA-66-2789-01	AMP;	AMP;
TCGA-66-2791-01	AMP;	AMP;
TCGA-66-2792-01	AMP;	AMP;
TCGA-66-2795-01	AMP;	AMP;
TCGA-18-4083-01	AMP;	AMP;
TCGA-18-4086-01	AMP;	AMP;
TCGA-37-4133-01	AMP;	AMP;
TCGA-51-4079-01	AMP;	AMP;
TCGA-51-4080-01	AMP;	AMP;
TCGA-51-4081-01	AMP;	AMP;
TCGA-22-4595-01	AMP;	AMP;
TCGA-22-4604-01	AMP;	AMP;
TCGA-33-4532-01	AMP;	AMP;
TCGA-33-4533-01	AMP;	AMP;
TCGA-33-4538-01	AMP;	AMP;
TCGA-33-4547-01	AMP;	AMP;
TCGA-66-2773-01	AMP;	AMP;
TCGA-66-2777-01	AMP;	AMP;
TCGA-66-2783-01	AMP;	AMP;
TCGA-66-2794-01	AMP;	AMP;
TCGA-66-2800-01	AMP;	AMP;
TCGA-18-3417-01	AMP;	AMP;
TCGA-18-4721-01	AMP;	AMP;
TCGA-22-4601-01	AMP;	AMP;
TCGA-22-4613-01	AMP;	AMP;
TCGA-33-4582-01	AMP;	AMP;
TCGA-34-5240-01	AMP;	AMP;
TCGA-34-5241-01	AMP;	GAIN;
TCGA-39-5016-01	AMP;	AMP;
TCGA-39-5021-01	AMP;	AMP;
TCGA-39-5031-01	AMP;	AMP;
TCGA-39-5036-01	AMP;	AMP;
TCGA-39-5037-01	AMP;	AMP;
TCGA-63-5131-01	AMP;	AMP;
TCGA-22-5478-01	Diploid	Diploid
TCGA-34-5234-01	Diploid	Diploid
TCGA-43-5668-01	Diploid	AMP;
TCGA-33-6737-01	Diploid	Diploid
TCGA-34-5239-01	Diploid	Diploid
TCGA-56-6546-01	Diploid	Diploid
TCGA-63-6202-01	Diploid	Diploid
TCGA-21-1078-01	Diploid	Diploid
TCGA-22-1011-01	Diploid	Diploid
TCGA-60-2720-01	Diploid	Diploid
TCGA-39-5039-01	Diploid	Diploid
Total cases with SOX2 gain/amp	166
SOX2 gain/amp cases with PIK3CA gain/amp	165

[truncated: 11 more sheets: Fig 5A, Fig 5C (BKM), Fig 5C (LY), Fig 5E, Fig 8B, Fig 10A, Fig 10B, Fig 10C, Fig 10D, Fig 12A, Fig 12B]
